# Supplementary material for: The miR-183/96/182 Cluster Regulates the Functions of Corneal Resident Macrophages
Source: PubMed Central journal article supplement (PMC7891884; doi:10.4049/immunohorizons.2000091), 2020-11-18
Supplement: NIHMS1666856-supplement-1.pdf [file NIHMS1666856-supplement-1.pdf]

## **Supplemental Information for**

The miR-183/96/182 cluster regulates the functions of corneal resident macrophages

Ardian Coku<sup>\*</sup>, Sharon A. McClellan<sup>\*</sup>, Eric Van Buren<sup>†</sup>, Jessica B. Back<sup>†</sup>, Linda D. Hazlett<sup>\*</sup>,  
Shunbin Xu<sup>\*‡</sup>

<sup>\*</sup> Department of Ophthalmology, Visual and Anatomical Sciences; <sup>†</sup> Department of Oncology,  
School of Medicine, Wayne State University, Detroit, Michigan

<sup>‡</sup> **Corresponding author:** Shunbin Xu, Department of Ophthalmology, Visual and Anatomical  
Sciences, Wayne State University School of Medicine, 540 E. Canfield Street, Detroit, MI  
48201, USA. Tel: 313-577-0127. Fax: 313-577-3125 [sxu@med.wayne.edu](mailto:sxu@med.wayne.edu)

### **This PDF file includes:**

Supplemental figures 1-6

Supplemental tables 1, 2

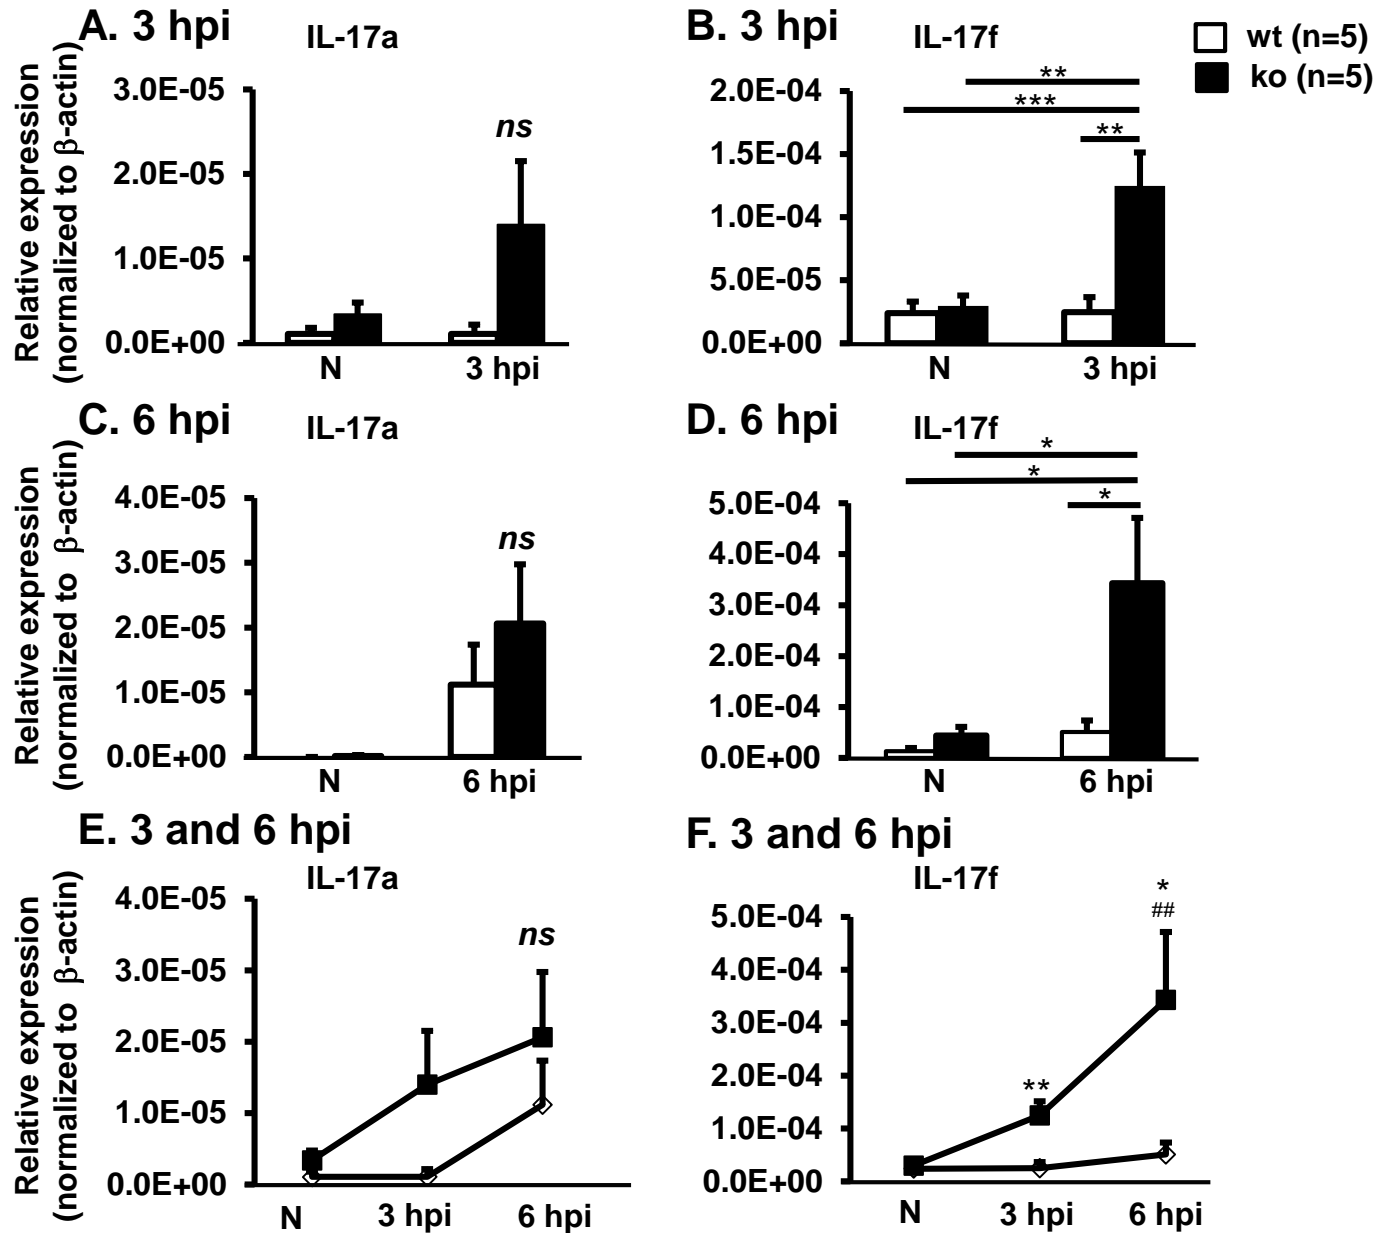

**Supplemental Figure 1. Dynamic changes of miR-17a and miR-17f expression at 3 and 6 hpi.** qRT-PCR of IL-17a (A,C,E) and IL-17f (B,D,F) in the corneas of young adult (8-12 weeks old) wt and ko mice at 3 (A,B) and 6 hpi (C,D) of PA infection. n=5/group. N: non-infected contralateral eyes. \* and \*\*: adjusted  $p < 0.05$  and  $p < 0.01$ , respectively, in comparison of ko vs. wt. ## : adjusted  $p < 0.01$  in comparison between 3 and 6 hpi. n.s.: not statistically significant.

**A. wt**

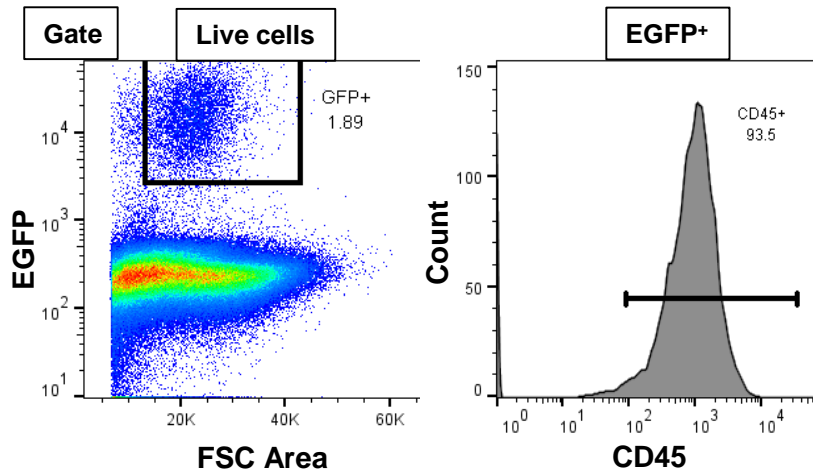

**B. ko**

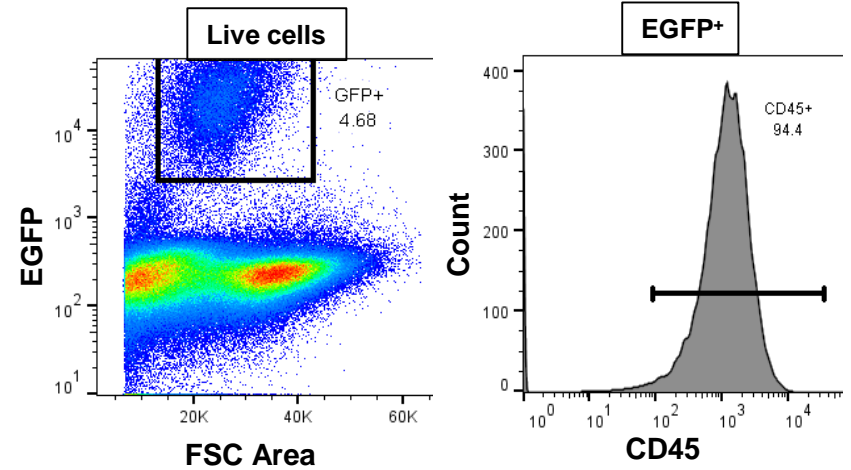

**Supplemental Figure 2.** >90% of the EGFP<sup>+</sup> cells are CD45<sup>+</sup> in the cornea of both miR-183/96/182 ko and wt control mice.

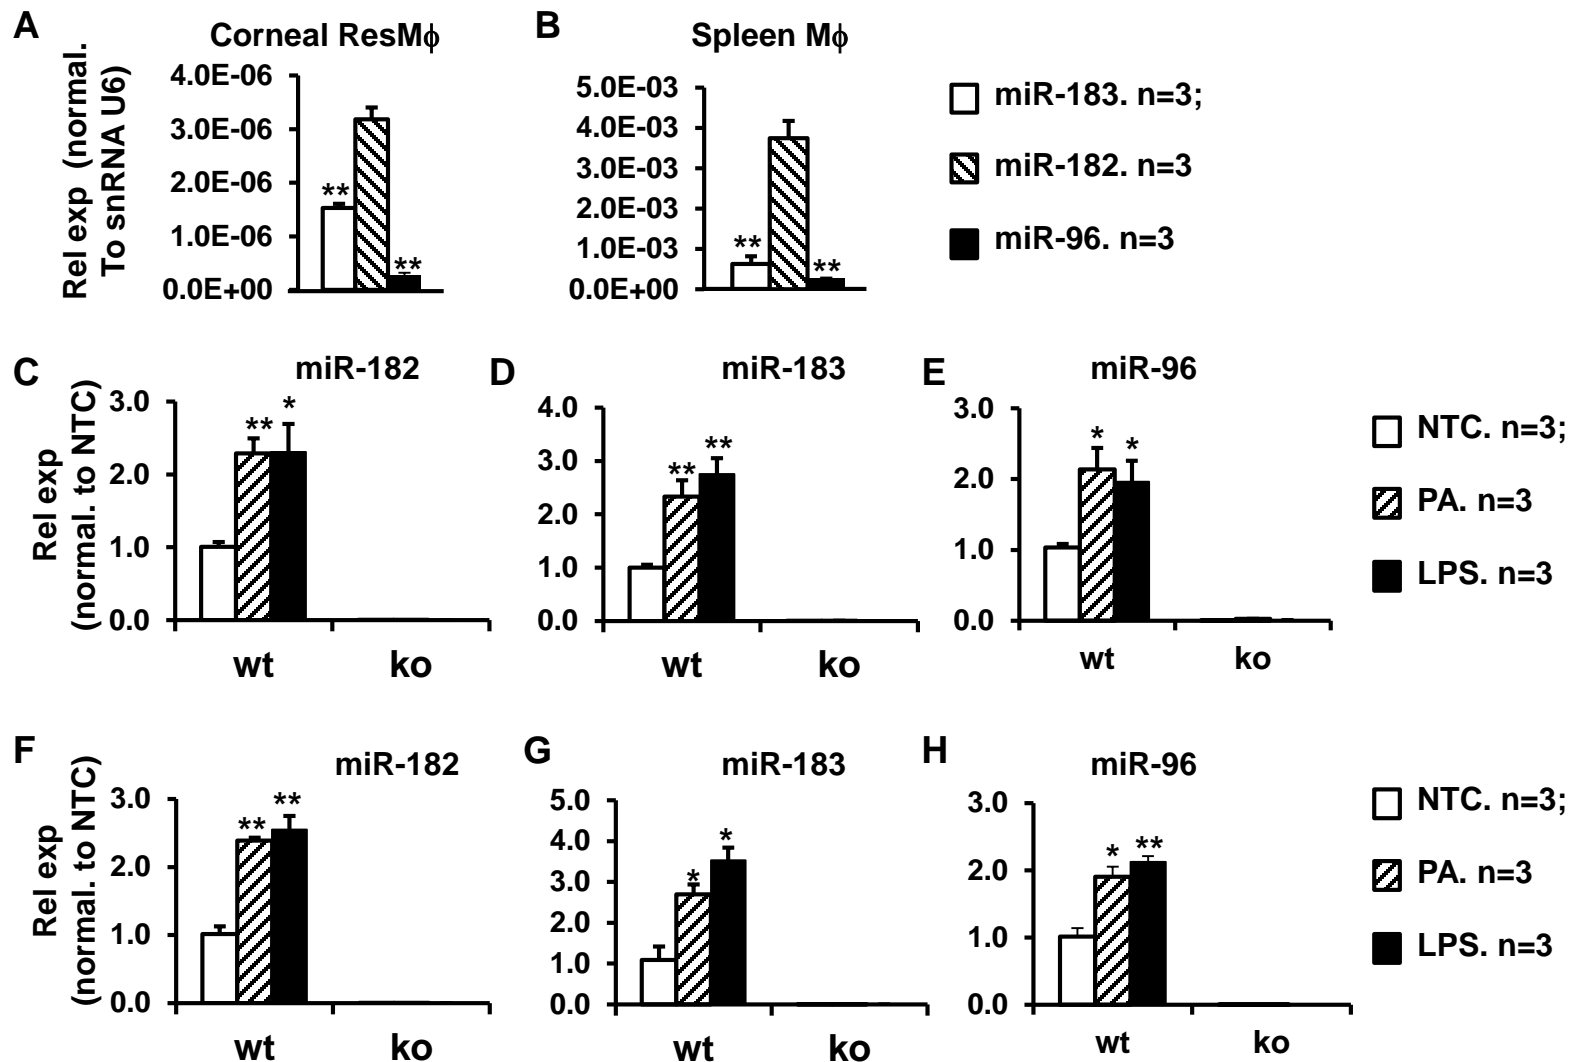

**Supplemental Figure 3.** miR-183/96/182 expression in corneal ResMφ (A, C-E) and spleen Mφ (B, F-H) in response to PA and LPS treatment. A, B: non-treated FACS-sorted CD45<sup>+</sup>CD11b<sup>+</sup>F4/80<sup>+</sup> corneal ResMφ (A) and spleen Mφ. \*\*:  $p < 0.01$  vs. miR-182. (C-E) corneal ResMφ and (F-G) spleen Mφ in response to 6-hour treatment of PA (MOI=5) or LPS (100 ng/ml). Relative expression levels (Rel exp) were normalized to snRNA U6 (A, B) or to the non-treated controls (NTC) (C-H).  $n=3$ /group. \*:  $p < 0.05$ ; \*\*:  $p < 0.01$  vs. wt NTC.

□ wt. n=3;    ■ ko. n=3

**A. Corneal resident macrophages (CD45<sup>+</sup>CD11b<sup>+</sup>F4/80<sup>+</sup>)**

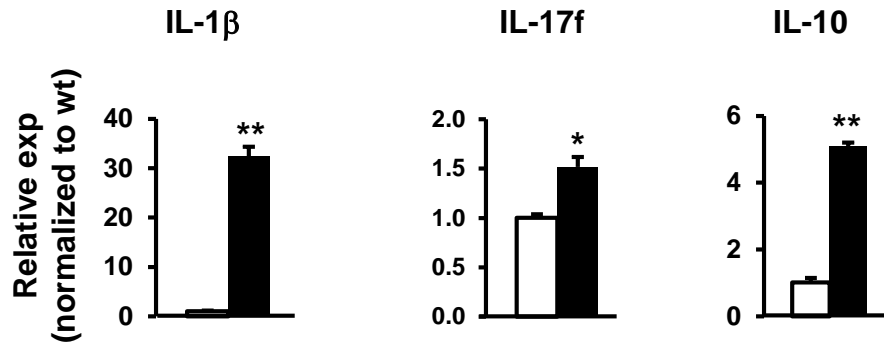

**B. Non-hematopoietic cells of the cornea (CD45<sup>-</sup>)**

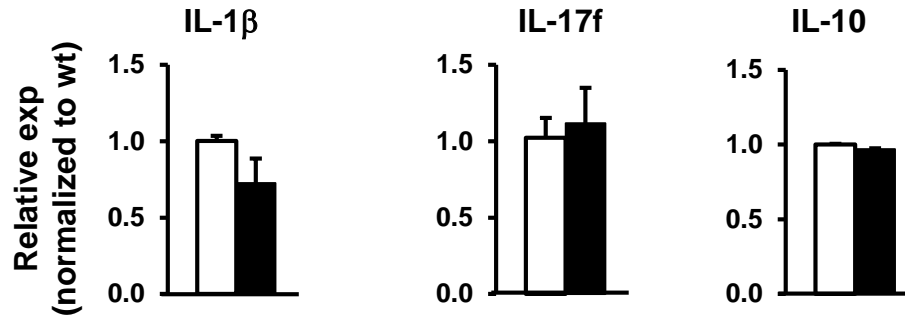

**Supplemental Figure 4.** IL-1 $\beta$ , IL-17f and IL-10 are simultaneously upregulated in corneal ResM $\phi$  (CD45<sup>+</sup>CD11b<sup>+</sup>F4/80<sup>+</sup>) (**A**) but not in the CD45<sup>-</sup> non-hematopoietic cells (**B**) of naïve miR-183/96/182 ko mice. qRT-PCR of IL-1 $\beta$ , IL-17f and IL-10. n=3/group. \*:  $p < 0.05$ ; \*\*:  $p < 0.01$ .

—◆— wt; —■— ko

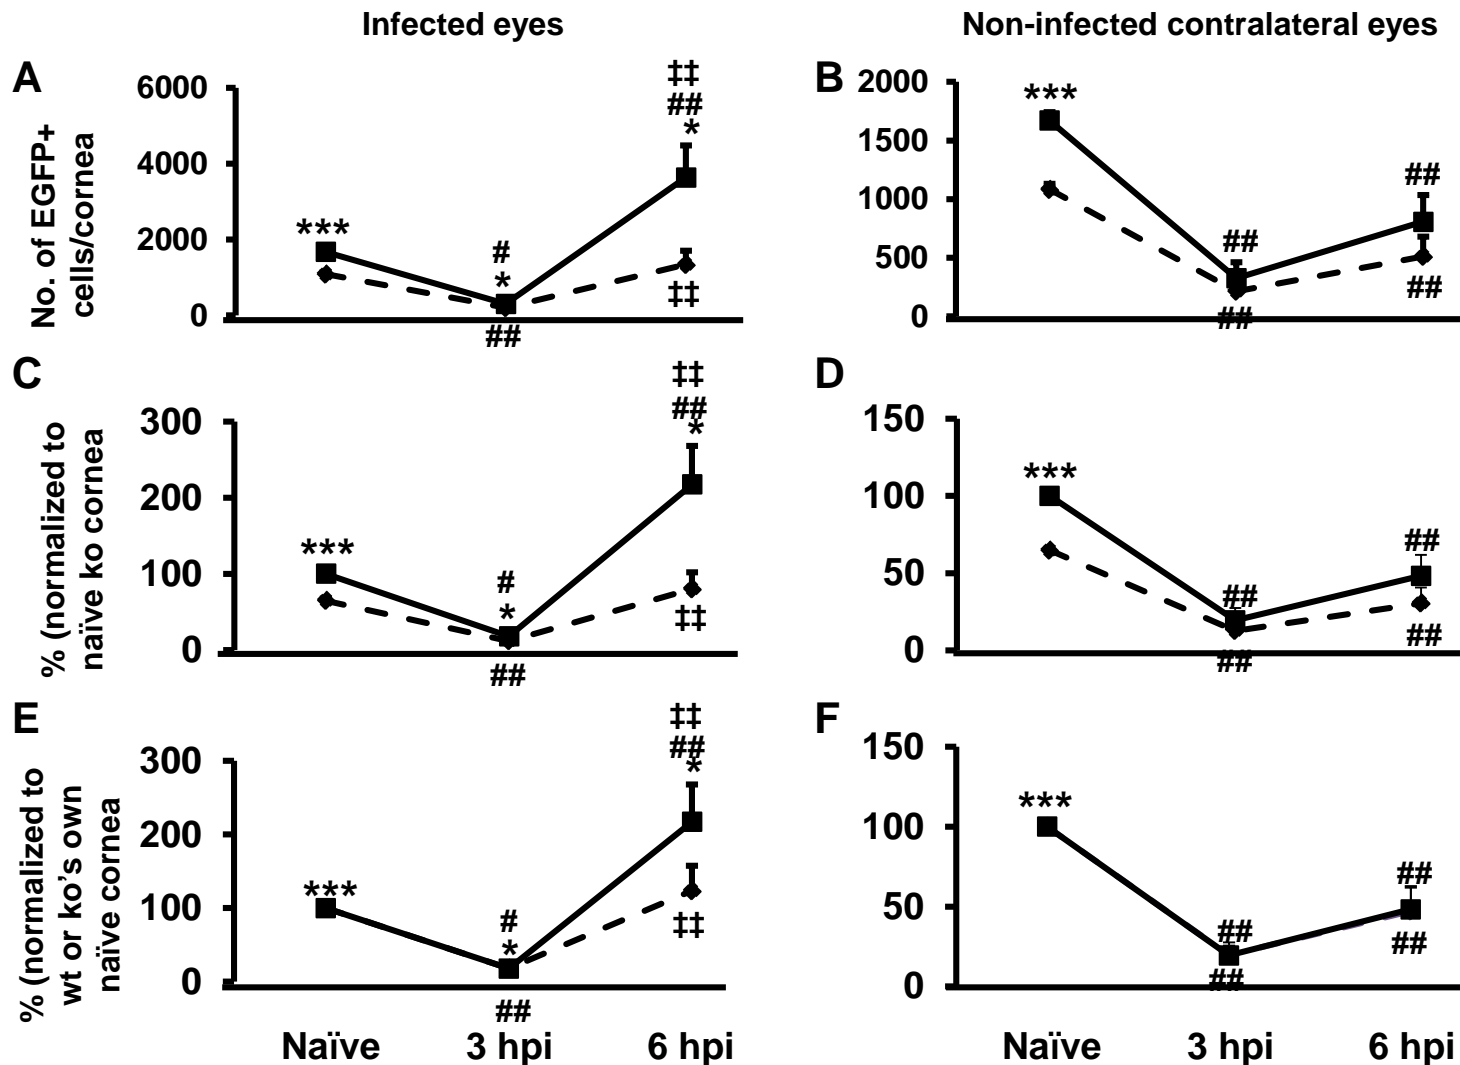

**Supplemental Figure 5. *Csf1r*-EGFP<sup>+</sup> MPS cells in the cornea have different dynamics in response to PA infection in miR-183/96/182 ko mice.** *Csf1r*-GFP<sup>+</sup> cell counts in corneal stroma flatmount of 8-12 weeks old miR-183/96/182 ko and age-matched wt controls at 3 hpi (n=3/genotype) and 6 hpi (n=3/genotype) in comparison to naïve mouse cornea (n=7/genotype). **A,C, E**: infected eyes; **B,D,F**: non-infected contralateral eyes. \* and \*\*\*:  $p < 0.05$  and  $p < 0.001$ , respectively, in comparison of ko vs. wt. # and ## :  $p < 0.05$  and  $p < 0.01$ , respectively, in comparison of 3 or 6 hpi vs. naïve mice; ‡ and ††:  $p < 0.05$  and  $p < 0.01$ , respectively, in comparison of numbers at 3 vs. 6 hpi in ko (above the curves) or wt control mice (below the curves).

### A. 3 hpi

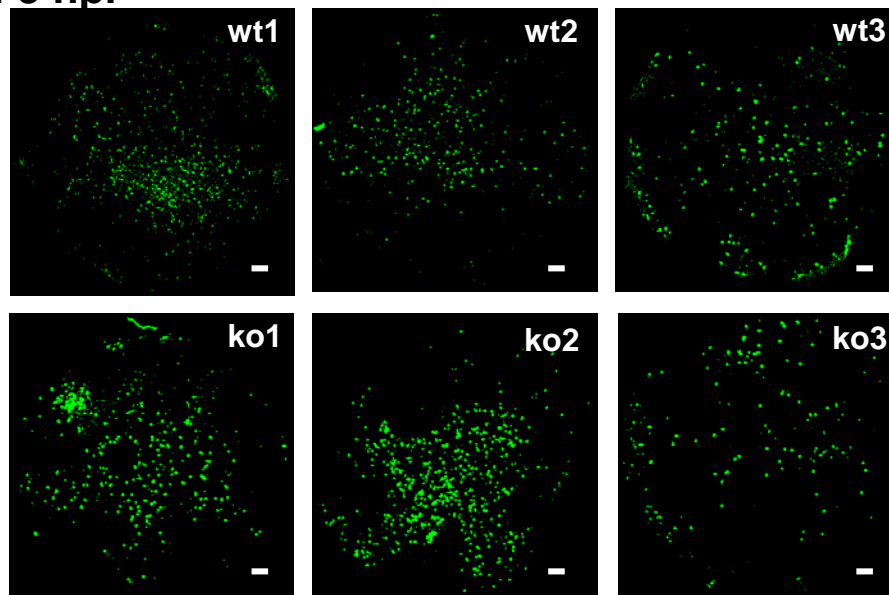

### B. 3 hpi

□ wt. n=3; ■ ko. n=3

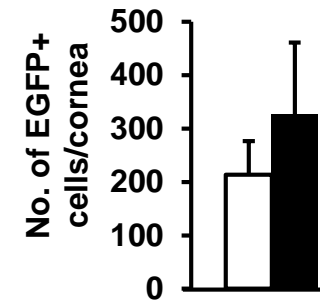

### C. 6 hpi

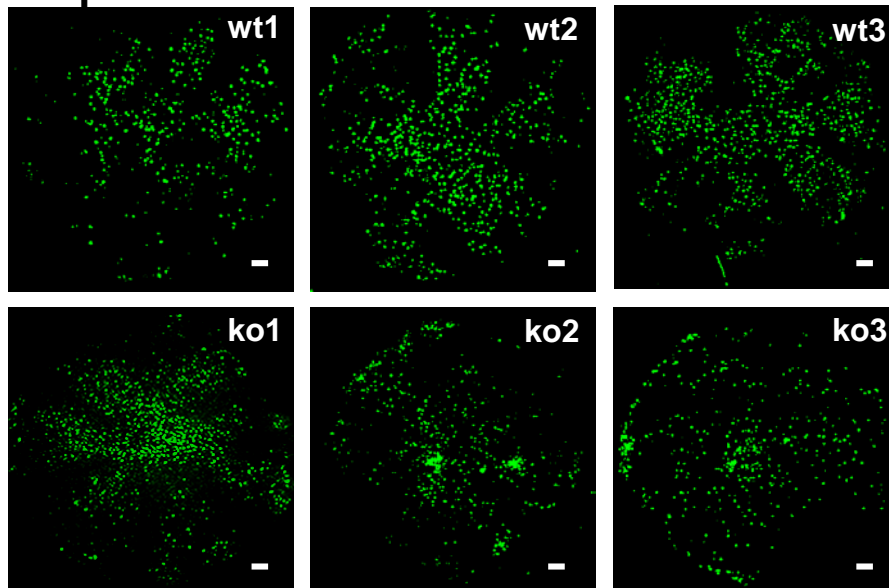

### D. 6 hpi

□ wt. n=3; ■ ko. n=3

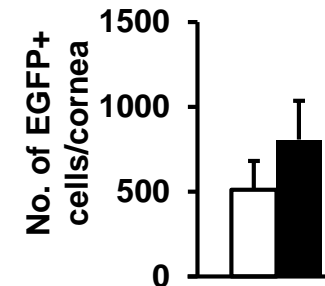

**Supplemental Figure 6. Dynamics of Csf1r-EGFP+ MPS cells in the non-infected contralateral eyes of PA-infected mice at 3 and 6 hpi.** Csf1r-GFP+ cell counts in corneal stromal flatmount of 8-12 weeks old miR-183/96/182 ko mice and age-matched wt controls (n=3/genotype).

**Supplemental table 1. Custome RT2 PCR array 1 (Cat No. 330171 CLAIM25224)**

| <b>Position</b> | <b>UniGene</b> | <b>GenBank</b> | <b>Symbol</b> | <b>Description</b>                        |
|-----------------|----------------|----------------|---------------|-------------------------------------------|
| A01             | Mm.2209        | NM_013488      | Cd4           | CD4 antigen                               |
| A02             | Mm.42044       | NM_017480      | Icos          | Inducible T-cell co-stimulator            |
| A03             | Mm.322843      | NM_020583      | Isg20         | Interferon-stimulated protein             |
| A04             | Mm.843         | NM_008511      | Lrmp          | Lymphoid-restricted membrane protein      |
| A05             | Mm.4922        | NM_009969      | Csf2          | Colony stimulating factor 2 (granulocyte- |
| A06             | Mm.1238        | NM_009971      | Csf3          | Colony stimulating factor 3 (granulocyte) |
| A07             | Mm.240327      | NM_008337      | Ifn $\gamma$  | Interferon gamma                          |
| A08             | Mm.874         | NM_010548      | Il10          | Interleukin 10                            |
| A09             | Mm.239707      | NM_001303244   | Il12b         | Interleukin 12b                           |
| A10             | Mm.1284        | NM_008355      | Il13          | Interleukin 13                            |
| A11             | Mm.4392        | NM_008357      | Il15          | Interleukin 15                            |
| A12             | Mm.5419        | NM_010552      | Il17a         | Interleukin 17A                           |
| B01             | Mm.222808      | NM_145834      | Il17c         | Interleukin 17C                           |
| B02             | Mm.390726      | NM_145837      | Il17d         | Interleukin 17D                           |
| B03             | Mm.222807      | NM_145856      | Il17f         | Interleukin 17F                           |
| B04             | Mm.1410        | NM_008360      | Il18          | Interleukin 18                            |
| B05             | Mm.222830      | NM_008361      | Il1b          | Interleukin 1 beta                        |
| B06             | Mm.14190       | NM_008366      | Il2           | Interleukin 2                             |
| B07             | Mm.393490      | NM_021782      | Il21          | Interleukin 21                            |
| B08             | Mm.103585      | NM_016971      | Il22          | Interleukin 22                            |
| B09             | Mm.125482      | NM_031252      | Il23a         | Interleukin 23, alpha subunit p19         |
| B10             | Mm.90154       | NM_080729      | Il25          | Interleukin 25                            |
| B11             | Mm.222632      | NM_145636      | Il27          | Interleukin 27                            |
| B12             | Mm.983         | NM_010556      | Il3           | Interleukin 3                             |
| C01             | Mm.276360      | NM_021283      | Il4           | Interleukin 4                             |
| C02             | Mm.4461        | NM_010558      | Il5           | Interleukin 5                             |
| C03             | Mm.1019        | NM_001314054   | Il6           | Interleukin 6                             |
| C04             | Mm.3006        | NM_008373      | Il9           | Interleukin 9                             |
| C05             | Mm.248380      | NM_011577      | Tgfb1         | Transforming growth factor, beta 1        |
| C06             | Mm.3992        | NM_009368      | Tgfb3         | Transforming growth factor, beta 3        |
| C07             | Mm.1293        | NM_013693      | Tnf           | Tumor necrosis factor                     |
| C08             | Mm.1283        | NM_011329      | Ccl1          | Chemokine (C-C motif) ligand 1            |
| C09             | Mm.290320      | NM_011333      | Ccl2          | Chemokine (C-C motif) ligand 2            |
| C10             | Mm.1282        | NM_011337      | Ccl3          | Chemokine (C-C motif) ligand 3            |
| C11             | Mm.244263      | NM_013652      | Ccl4          | Chemokine (C-C motif) ligand 4            |
| C12             | Mm.284248      | NM_013653      | Ccl5          | Chemokine (C-C motif) ligand 5            |
| D01             | Mm.116739      | NM_016960      | Ccl20         | Chemokine (C-C motif) ligand 20           |
| D02             | Mm.12895       | NM_009137      | Ccl22         | Chemokine (C-C motif) ligand 22           |
| D03             | Mm.341574      | NM_013654      | Ccl7          | Chemokine (C-C motif) ligand 7            |
| D04             | Mm.103711      | NM_009142      | Cx3cl1        | Chemokine (C-X3-C motif) ligand 1         |
| D05             | Mm.21013       | NM_008176      | Cxcl1         | Chemokine (C-X-C motif) ligand 1          |
| D06             | Mm.303231      | NM_021704      | Cxcl12        | Chemokine (C-X-C motif) ligand 12         |
| D07             | Mm.4979        | NM_009140      | Cxcl2         | Chemokine (C-X-C motif) ligand 2          |
| D08             | Mm.244289      | NM_203320      | Cxcl3         | Chemokine (C-X-C motif) ligand 3          |
| D09             | Mm.4660        | NM_009141      | Cxcl5         | Chemokine (C-X-C motif) ligand 5          |
| D10             | Mm.6272        | NM_009915      | Ccr2          | Chemokine (C-C motif) receptor 2          |
| D11             | Mm.1337        | NM_009916      | Ccr4          | Chemokine (C-C motif) receptor 4          |
| D12             | Mm.8007        | NM_009835      | Ccr6          | Chemokine (C-C motif) receptor 6          |
| E01             | Mm.896         | NM_008362      | Il1r1         | Interleukin 1 receptor, type I            |
| E02             | Mm.731         | NM_008353      | Il12rb1       | Interleukin 12 receptor, beta 1           |
| E03             | Mm.188337      | NM_008354      | Il12rb2       | Interleukin 12 receptor, beta 2           |
| E04             | Mm.4481        | NM_008359      | Il17ra        | Interleukin 17 receptor A                 |
| E05             | Mm.269363      | NM_019583      | Il17rb        | Interleukin 17 receptor B                 |



|     |           |           |        |                                               |
|-----|-----------|-----------|--------|-----------------------------------------------|
| E06 | Mm.213397 | NM_134159 | Il17rc | Interleukin 17 receptor C                     |
| E07 | Mm.131781 | NM_145826 | Il17re | Interleukin 17 receptor E                     |
| E08 | Mm.221227 | NM_144548 | Il23r  | Interleukin 23 receptor                       |
| E09 | Mm.2856   | NM_010559 | Il6ra  | Interleukin 6 receptor, alpha                 |
| E10 | Mm.389    | NM_008372 | Il7r   | Interleukin 7 receptor                        |
| E11 | Mm.4861   | NM_011616 | Cd40lg | CD40 ligand                                   |
| E12 | Mm.439656 | NM_009883 | Cebpb  | CCAAT/enhancer binding protein (C/EBP),       |
| F01 | Mm.239516 | NM_020008 | Clec7a | C-type lectin domain family 7, member a       |
| F02 | Mm.182291 | NM_054039 | Foxp3  | Forkhead box P3                               |
| F03 | Mm.313866 | NM_008091 | Gata3  | GATA binding protein 3                        |
| F04 | Mm.4677   | NM_013674 | Irf4   | Interferon regulatory factor 4                |
| F05 | Mm.289657 | NM_146145 | Jak1   | Janus kinase 1                                |
| F06 | Mm.275839 | NM_008413 | Jak2   | Janus kinase 2                                |
| F07 | Mm.4993   | NM_010809 | Mmp3   | Matrix metalloproteinase 3                    |
| F08 | Mm.4406   | NM_013599 | Mmp9   | Matrix metalloproteinase 9                    |
| F09 | Mm.213003 | NM_010851 | Myd88  | Myeloid differentiation primary response gene |
| F10 | Mm.116802 | NM_010899 | Nfatc2 | Nuclear factor of activated T-cells,          |
| F11 | Mm.256765 | NM_008689 | Nfkb1  | Nuclear factor of kappa light polypeptide     |
| F12 | Mm.378450 | NM_013646 | Rora   | RAR-related orphan receptor alpha             |
| G01 | Mm.4372   | NM_011281 | Rorc   | RAR-related orphan receptor gamma             |
| G02 | Mm.4081   | NM_009821 | Runx1  | Runt related transcription factor 1           |
| G03 | Mm.982    | NM_007901 | S1pr1  | Sphingosine-1-phosphate receptor 1            |
| G04 | Mm.130    | NM_009896 | Socs1  | Suppressor of cytokine signaling 1            |
| G05 | Mm.3468   | NM_007707 | Socs3  | Suppressor of cytokine signaling 3            |
| G06 | Mm.473190 | NM_011486 | Stat3  | Signal transducer and activator of            |
| G07 | Mm.1550   | NM_011487 | Stat4  | Signal transducer and activator of            |
| G08 | Mm.277403 | NM_011488 | Stat5a | Signal transducer and activator of            |
| G09 | Mm.121721 | NM_009284 | Stat6  | Signal transducer and activator of            |
| G10 | Mm.375031 | NM_011518 | Syk    | Spleen tyrosine kinase                        |
| G11 | Mm.94519  | NM_019507 | Tbx21  | T-box 21                                      |
| G12 | Mm.292729 | NM_009424 | Traf6  | Tnf receptor-associated factor 6              |
| H01 | Mm.1051   | NM_009807 | Casp1  | Caspase 1                                     |
| H02 | Mm.14874  | NM_013542 | Gzmb   | Granzyme B                                    |
| H03 | Mm.4528   | NM_008479 | Lag3   | Lymphocyte-activation gene 3                  |
| H04 | Mm.248615 | NM_010705 | Lgals3 | Lectin, galactose binding, soluble 3          |
| H05 | Mm.309092 | NM_008084 | Gapdh  | Glyceraldehyde-3-phosphate dehydrogenase      |
| H06 | Mm.328431 | NM_007393 | Actb   | Actin, beta                                   |
| H07 | Mm.163    | NM_009735 | B2m    | Beta-2 microglobulin                          |
| H08 | Mm.328431 | NM_007393 | Actb   | Actin, beta                                   |
| H09 | Mm.328431 | NM_007393 | Actb   | Actin, beta                                   |
| H10 | N/A       | SA_00104  | RTC    | Reverse Transcription Control                 |
| H11 | N/A       | SA_00103  | PPC    | Positive PCR Control                          |
| H12 | N/A       | SA_00106  | MGDC   | Mouse Genomic DNA Contamination               |

**Supplemental table 2. Custome RT2 PCR array 2 - focused panel (Cat No. 330171 CLAIM30394)**

| Position | UniGene   | GenBank   | Symbol  | Description                                        |
|----------|-----------|-----------|---------|----------------------------------------------------|
| A01      | Mm.874    | NM_010548 | Il10    | Interleukin 10                                     |
| A02      | Mm.5419   | NM_010552 | Il17a   | Interleukin 17A                                    |
| A03      | Mm.390726 | NM_145837 | Il17d   | Interleukin 17D                                    |
| B01      | Mm.222807 | NM_145856 | Il17f   | Interleukin 17F                                    |
| B02      | Mm.222830 | NM_008361 | Il1b    | Interleukin 1 beta                                 |
| B03      | Mm.125482 | NM_031252 | Il23a   | Interleukin 23, alpha subunit p19                  |
| C01      | Mm.4461   | NM_010558 | Il5     | Interleukin 5                                      |
| C02      | Mm.248380 | NM_011577 | Tgfb1   | Transforming growth factor, beta 1                 |
| C03      | Mm.290320 | NM_011333 | Ccl2    | Chemokine (C-C motif) ligand 2                     |
| D01      | Mm.284248 | NM_013653 | Ccl5    | Chemokine (C-C motif) ligand 5                     |
| D02      | Mm.4979   | NM_009140 | Cxcl2   | Chemokine (C-X-C motif) ligand 2                   |
| D03      | Mm.6272   | NM_009915 | Ccr2    | Chemokine (C-C motif) receptor 2                   |
| E01      | Mm.188337 | NM_008354 | Il12rb2 | Interleukin 12 receptor, beta 2                    |
| E02      | Mm.131781 | NM_145826 | Il17re  | Interleukin 17 receptor E                          |
| E03      | Mm.239516 | NM_020008 | Clec7a  | C-type lectin domain family 7, member a            |
| F01      | Mm.275839 | NM_008413 | Jak2    | Janus kinase 2                                     |
| F02      | Mm.4372   | NM_011281 | Rorc    | RAR-related orphan receptor gamma                  |
| F03      | Mm.4081   | NM_009821 | Runx1   | Runt related transcription factor 1                |
| G01      | Mm.121721 | NM_009284 | Stat6   | Signal transducer and activator of transcription 6 |
| G02      | Hs.592355 | NM_002046 | GAPDH   | Glyceraldehyde-3-phosphate dehydrogenase           |
| G03      | Mm.328431 | NM_007393 | Actb    | Actin, beta                                        |
| H01      | N/A       | SA_00104  | RTC     | Reverse Transcription Control                      |
| H02      | N/A       | SA_00103  | PPC     | Positive PCR Control                               |
| H03      | N/A       | SA_00106  | MGDC    | Mouse Genomic DNA Contamination                    |
|          |           |           |         |                                                    |
| A04      | Mm.874    | NM_010548 | Il10    | Interleukin 10                                     |
| A05      | Mm.5419   | NM_010552 | Il17a   | Interleukin 17A                                    |
| A06      | Mm.390726 | NM_145837 | Il17d   | Interleukin 17D                                    |
| B04      | Mm.222807 | NM_145856 | Il17f   | Interleukin 17F                                    |
| B05      | Mm.222830 | NM_008361 | Il1b    | Interleukin 1 beta                                 |
| B06      | Mm.125482 | NM_031252 | Il23a   | Interleukin 23, alpha subunit p19                  |
| C04      | Mm.4461   | NM_010558 | Il5     | Interleukin 5                                      |
| C05      | Mm.248380 | NM_011577 | Tgfb1   | Transforming growth factor, beta 1                 |
| C06      | Mm.290320 | NM_011333 | Ccl2    | Chemokine (C-C motif) ligand 2                     |
| D04      | Mm.284248 | NM_013653 | Ccl5    | Chemokine (C-C motif) ligand 5                     |
| D05      | Mm.4979   | NM_009140 | Cxcl2   | Chemokine (C-X-C motif) ligand 2                   |
| D06      | Mm.6272   | NM_009915 | Ccr2    | Chemokine (C-C motif) receptor 2                   |
| E04      | Mm.188337 | NM_008354 | Il12rb2 | Interleukin 12 receptor, beta 2                    |
| E05      | Mm.131781 | NM_145826 | Il17re  | Interleukin 17 receptor E                          |
| E06      | Mm.239516 | NM_020008 | Clec7a  | C-type lectin domain family 7, member a            |
| F04      | Mm.275839 | NM_008413 | Jak2    | Janus kinase 2                                     |
| F05      | Mm.4372   | NM_011281 | Rorc    | RAR-related orphan receptor gamma                  |
| F06      | Mm.4081   | NM_009821 | Runx1   | Runt related transcription factor 1                |
| G04      | Mm.121721 | NM_009284 | Stat6   | Signal transducer and activator of transcription 6 |
| G05      | Hs.592355 | NM_002046 | GAPDH   | Glyceraldehyde-3-phosphate dehydrogenase           |
| G06      | Mm.328431 | NM_007393 | Actb    | Actin, beta                                        |
| H04      | N/A       | SA_00104  | RTC     | Reverse Transcription Control                      |
| H05      | N/A       | SA_00103  | PPC     | Positive PCR Control                               |
| H06      | N/A       | SA_00106  | MGDC    | Mouse Genomic DNA Contamination                    |
|          |           |           |         |                                                    |
| A07      | Mm.874    | NM_010548 | Il10    | Interleukin 10                                     |
| A08      | Mm.5419   | NM_010552 | Il17a   | Interleukin 17A                                    |

|     |           |           |         |                                                    |
|-----|-----------|-----------|---------|----------------------------------------------------|
| A09 | Mm.390726 | NM_145837 | Il17d   | Interleukin 17D                                    |
| B07 | Mm.222807 | NM_145856 | Il17f   | Interleukin 17F                                    |
| B08 | Mm.222830 | NM_008361 | Il1b    | Interleukin 1 beta                                 |
| B09 | Mm.125482 | NM_031252 | Il23a   | Interleukin 23, alpha subunit p19                  |
| C07 | Mm.4461   | NM_010558 | Il5     | Interleukin 5                                      |
| C08 | Mm.248380 | NM_011577 | Tgfb1   | Transforming growth factor, beta 1                 |
| C09 | Mm.290320 | NM_011333 | Ccl2    | Chemokine (C-C motif) ligand 2                     |
| D07 | Mm.284248 | NM_013653 | Ccl5    | Chemokine (C-C motif) ligand 5                     |
| D08 | Mm.4979   | NM_009140 | Cxcl2   | Chemokine (C-X-C motif) ligand 2                   |
| D09 | Mm.6272   | NM_009915 | Ccr2    | Chemokine (C-C motif) receptor 2                   |
| E07 | Mm.188337 | NM_008354 | Il12rb2 | Interleukin 12 receptor, beta 2                    |
| E08 | Mm.131781 | NM_145826 | Il17re  | Interleukin 17 receptor E                          |
| E09 | Mm.239516 | NM_020008 | Clec7a  | C-type lectin domain family 7, member a            |
| F07 | Mm.275839 | NM_008413 | Jak2    | Janus kinase 2                                     |
| F08 | Mm.4372   | NM_011281 | Rorc    | RAR-related orphan receptor gamma                  |
| F09 | Mm.4081   | NM_009821 | Runx1   | Runt related transcription factor 1                |
| G07 | Mm.121721 | NM_009284 | Stat6   | Signal transducer and activator of transcription 6 |
| G08 | Hs.592355 | NM_002046 | GAPDH   | Glyceraldehyde-3-phosphate dehydrogenase           |
| G09 | Mm.328431 | NM_007393 | Actb    | Actin, beta                                        |
| H07 | N/A       | SA_00104  | RTC     | Reverse Transcription Control                      |
| H08 | N/A       | SA_00103  | PPC     | Positive PCR Control                               |
| H09 | N/A       | SA_00106  | MGDC    | Mouse Genomic DNA Contamination                    |
|     |           |           |         |                                                    |
| A10 | Mm.874    | NM_010548 | Il10    | Interleukin 10                                     |
| A11 | Mm.5419   | NM_010552 | Il17a   | Interleukin 17A                                    |
| A12 | Mm.390726 | NM_145837 | Il17d   | Interleukin 17D                                    |
| B10 | Mm.222807 | NM_145856 | Il17f   | Interleukin 17F                                    |
| B11 | Mm.222830 | NM_008361 | Il1b    | Interleukin 1 beta                                 |
| B12 | Mm.125482 | NM_031252 | Il23a   | Interleukin 23, alpha subunit p19                  |
| C10 | Mm.4461   | NM_010558 | Il5     | Interleukin 5                                      |
| C11 | Mm.248380 | NM_011577 | Tgfb1   | Transforming growth factor, beta 1                 |
| C12 | Mm.290320 | NM_011333 | Ccl2    | Chemokine (C-C motif) ligand 2                     |
| D10 | Mm.284248 | NM_013653 | Ccl5    | Chemokine (C-C motif) ligand 5                     |
| D11 | Mm.4979   | NM_009140 | Cxcl2   | Chemokine (C-X-C motif) ligand 2                   |
| D12 | Mm.6272   | NM_009915 | Ccr2    | Chemokine (C-C motif) receptor 2                   |
| E10 | Mm.188337 | NM_008354 | Il12rb2 | Interleukin 12 receptor, beta 2                    |
| E11 | Mm.131781 | NM_145826 | Il17re  | Interleukin 17 receptor E                          |
| E12 | Mm.239516 | NM_020008 | Clec7a  | C-type lectin domain family 7, member a            |
| F10 | Mm.275839 | NM_008413 | Jak2    | Janus kinase 2                                     |
| F11 | Mm.4372   | NM_011281 | Rorc    | RAR-related orphan receptor gamma                  |
| F12 | Mm.4081   | NM_009821 | Runx1   | Runt related transcription factor 1                |
| G10 | Mm.121721 | NM_009284 | Stat6   | Signal transducer and activator of transcription 6 |
| G11 | Hs.592355 | NM_002046 | GAPDH   | Glyceraldehyde-3-phosphate dehydrogenase           |
| G12 | Mm.328431 | NM_007393 | Actb    | Actin, beta                                        |
| H10 | N/A       | SA_00104  | RTC     | Reverse Transcription Control                      |
| H11 | N/A       | SA_00103  | PPC     | Positive PCR Control                               |
| H12 | N/A       | SA_00106  | MGDC    | Mouse Genomic DNA Contamination                    |
